# Supplementary material
Source: Springer Nature journal article supplement (https://www.springermedizin.de/resource/supplementary/12981_2012_244_MOESM2_ESM.pdf/9604142)

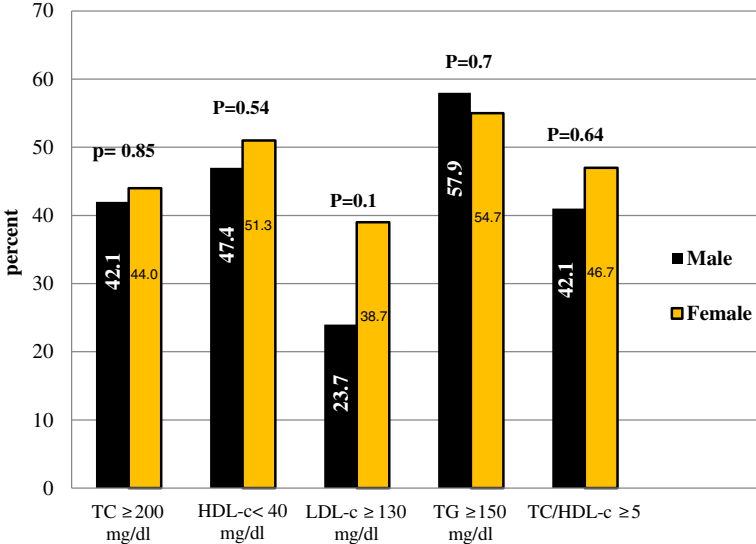

Supplement: MOESM2 [file 9604142]
